# Supplementary material for: Molybdenum blue preassembly strategy to design bimetallic Fe0.54Mo0.73/Mo2C@C for tuneable and low-frequency electromagnetic wave absorption
Source: Royal Society of Chemistry journal article supplement (doi:10.1039/d2qi00323f), 2022-01-01
Supplement: d2qi00323f1.pdf [file d2qi00323f1.pdf]

Electronic Supplementary Information

**Molybdenum Blue Preassembly Strategy to Design Bimetallic  
 $\text{Fe}_{0.54}\text{Mo}_{0.73}/\text{Mo}_2\text{C}@C$  for Tunable Low-Frequency Electromagnetic  
Wave Absorption**

Peng He,<sup>ade</sup> Runze Ma,<sup>ac</sup> Chen Li,<sup>b</sup> Ling Ran,<sup>ad</sup> Wentao Yuan,<sup>a</sup> Yuyang Han,<sup>de</sup>  
Lianwen Deng,<sup>b</sup> and Jun Yan<sup>\*acde</sup>

<sup>a</sup> College of Chemistry and Chemical Engineering, Central South University, Changsha, 410083, P. R. China

<sup>b</sup> Institute of Super-Microstructure and Ultrafast Process in Advanced Materials, School of Physics and Electronics, Central South University, Changsha, 410083, P. R. China

<sup>c</sup> Hunan Provincial Key Laboratory of Chemical Power Sources, Central South University, Changsha, 410083, P. R. China

<sup>d</sup> Hunan Provincial Key Laboratory of Efficient and Clean Utilization of Manganese Resources, Central South University, Changsha, 410083, P. R. China

<sup>e</sup> Hunan Provincial Key Laboratory of Micro & Nano Materials Interface Science, Central South University, Changsha, 410083, P. R. China

Email: yanjun@csu.edu.cn

## Table of Contents

|                                                                                                                                                                                                                               |          |
|-------------------------------------------------------------------------------------------------------------------------------------------------------------------------------------------------------------------------------|----------|
| Figure S1. FTIR spectra of $\text{Mo}_6\text{C}/\text{Mo}_72\text{Fe}_{30}$ .....                                                                                                                                             | S3       |
| Figure S2. XRD patterns of FMC and MC.....                                                                                                                                                                                    | S3       |
| Figure S3. The EDX elemental spectra of FMC.....                                                                                                                                                                              | S4       |
| Figure S4. The EDX elemental maps of FMC (a) Corresponding samples, (b) Fe, (c) Mo, (d) C and (e).....                                                                                                                        | S4       |
| Figure S5. SEM images of (a) FMC-1, (b) FMC-2, (c) FMC-3, (d) FMC-4, (e) FMC-5 and (f) FMC-6.....                                                                                                                             | S5       |
| Figure S6. (a) The full XPS spectra of MC. (b-d) High-resolution XPS spectra of MC: (b) C, (c) N and (d) Mo.....                                                                                                              | S5       |
| Figure S7. Raman spectra of FMC.....                                                                                                                                                                                          | S6       |
| Figure S8. Contour maps depended on the frequency and the thickness of the absorbers for (a) FMC-1, (b) FMC-2, (c) FMC-3, (d) FMC-4, (e) FMC-5 and (f) FMC-6.....                                                             | S7       |
| Figure S9. Electromagnetic parameters of MC (the real $\epsilon'$ (a) and imaginary $\epsilon''$ (b) parts of the complex permittivity; the real $\mu'$ (c) and imaginary $\mu''$ (d) parts of the complex permeability)..... | S8       |
| Figure S10. Electromagnetic parameters of MC (dielectric loss $\tan\delta_\epsilon$ (a), and magnetic loss $\tan\delta_\mu$ .....)                                                                                            | S8       |
| Figure S11. Electromagnetic parameters of FMC composites (dielectric loss $\tan\delta_\epsilon$ (a), and magnetic loss $\tan\delta_\mu$ (b)).....                                                                             | S9       |
| Figure S12. Cole-Cole plots of MC and FMCs.....)                                                                                                                                                                              | S10      |
| Figure S13. $C_0$ values of MC and FMCs in the frequency range of 2-18 GHz.....                                                                                                                                               | S11      |
| Figure S14. Attenuation constant $\alpha$ of MC and FMCs in the frequency range of 2-18 GHz.....                                                                                                                              | S11      |
| Figure S15. The impedance matching value Z of MC and FMCs in the frequency range of 2-18 GHz                                                                                                                                  |          |
| Table S1. ICP–OES results of FMCs.....                                                                                                                                                                                        | S13      |
| Table S2. Electromagnetic wave absorption of typical carbon-based materials reported in recent literatures.....                                                                                                               | S13      |
| References.....                                                                                                                                                                                                               | S14, S15 |

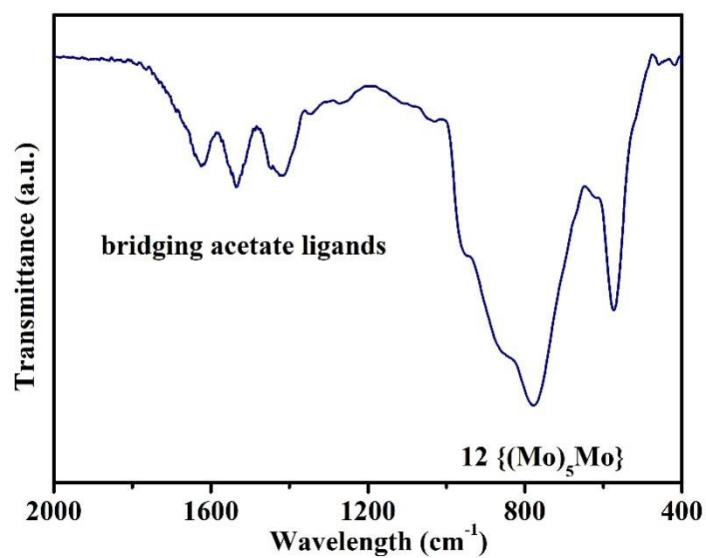

Figure S1. FTIR spectra of Mo<sub>6</sub>C-Mo<sub>72</sub>Fe<sub>30</sub>.

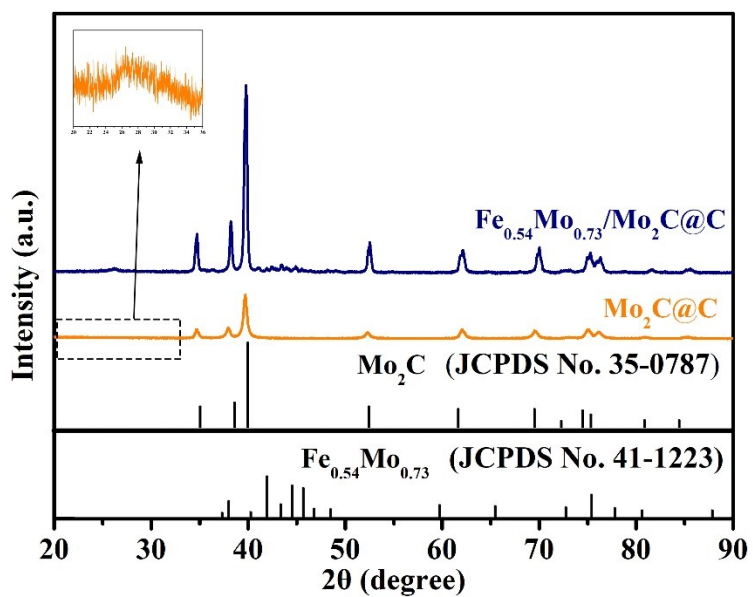

Figure S2. XRD patterns of FMC and MC.

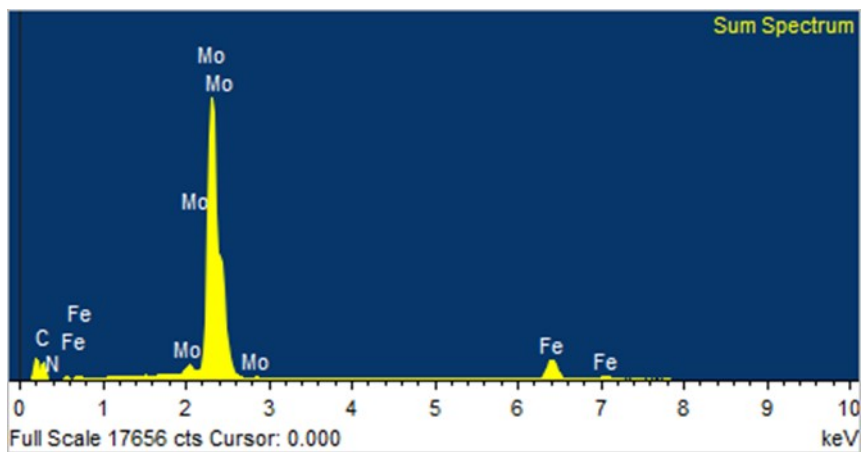

**Figure S3.** The EDX elemental spectra of FMC.

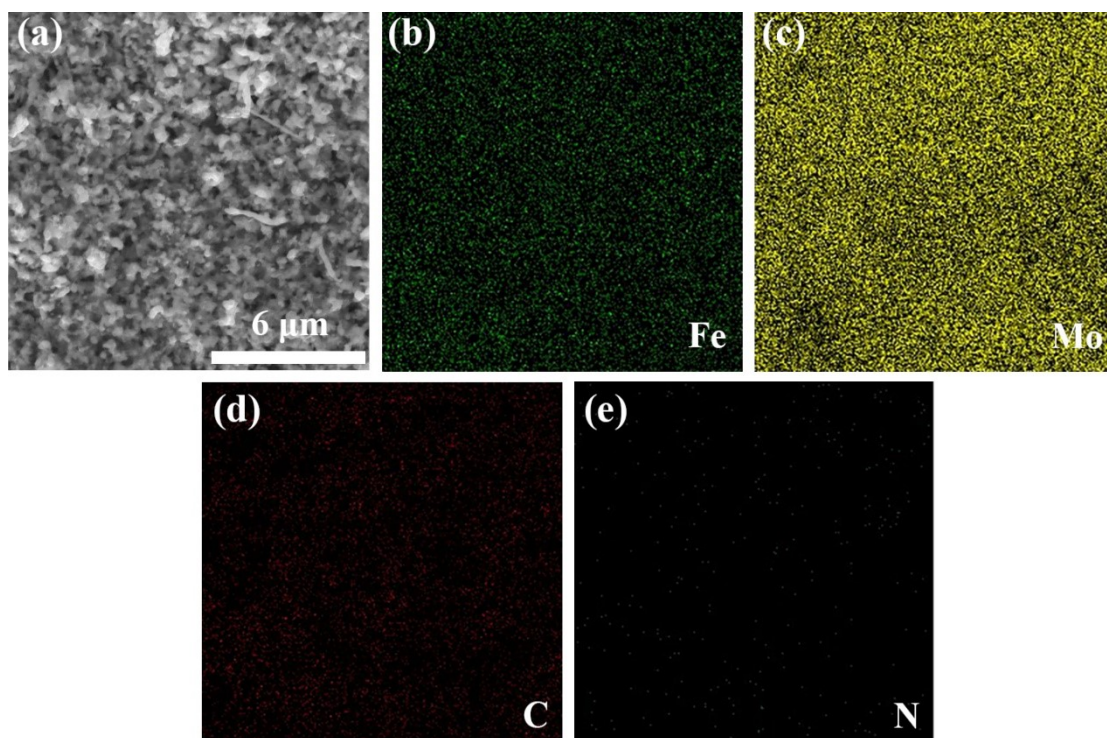

**Figure S4.** The EDX elemental maps of FMC (a) Corresponding samples, (b) Fe, (c) Mo, (d) C and (e) N.

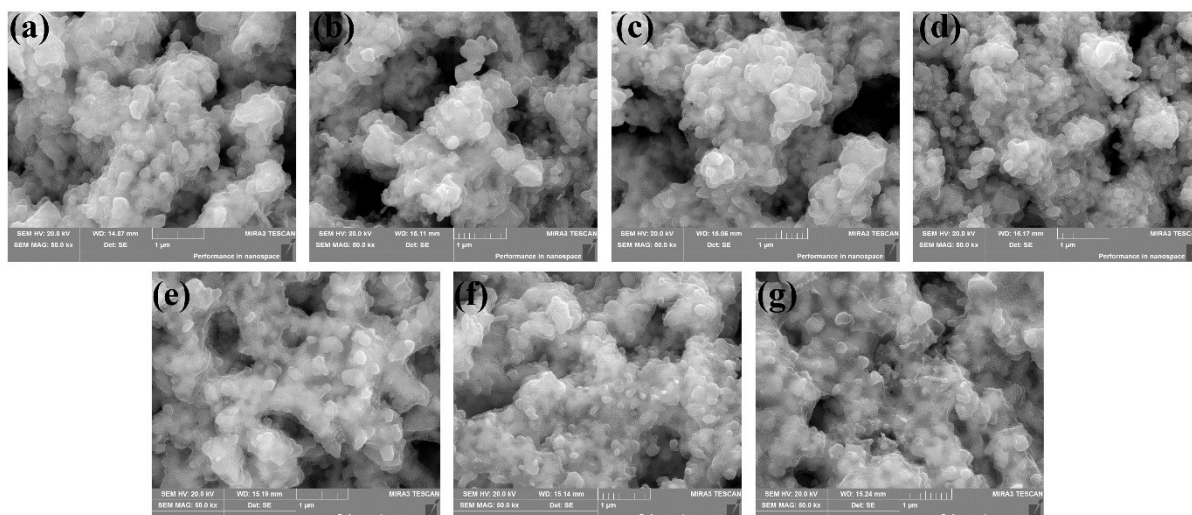

**Figure S5.** SEM images of (a) FMC-1, (b) FMC-2, (c) FMC-3, (d) FMC-4, (e) FMC-5 and (f) FMC-6.

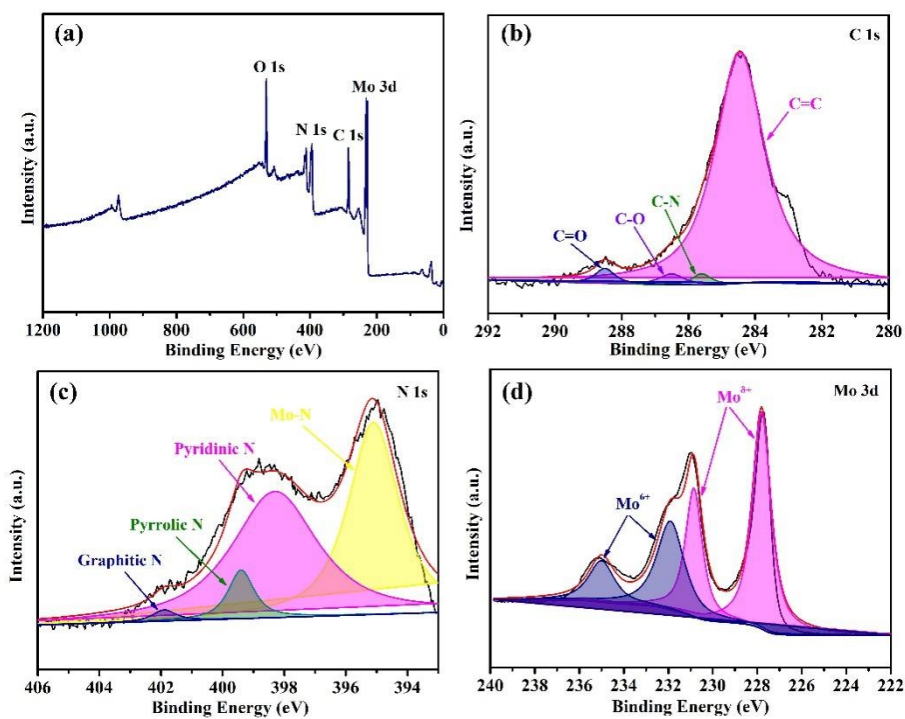

**Figure S6.** (a) The full XPS spectra of MC. (b-d) High-resolution XPS spectra of MC: (b) C, (c) N and (d) Mo.

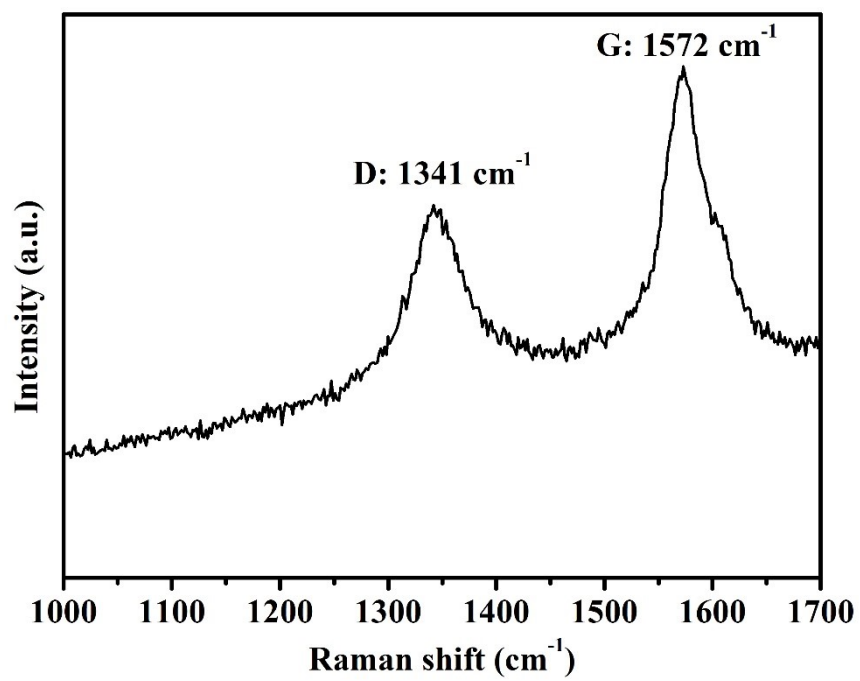

**Figure S7.** Raman spectra of FMC.

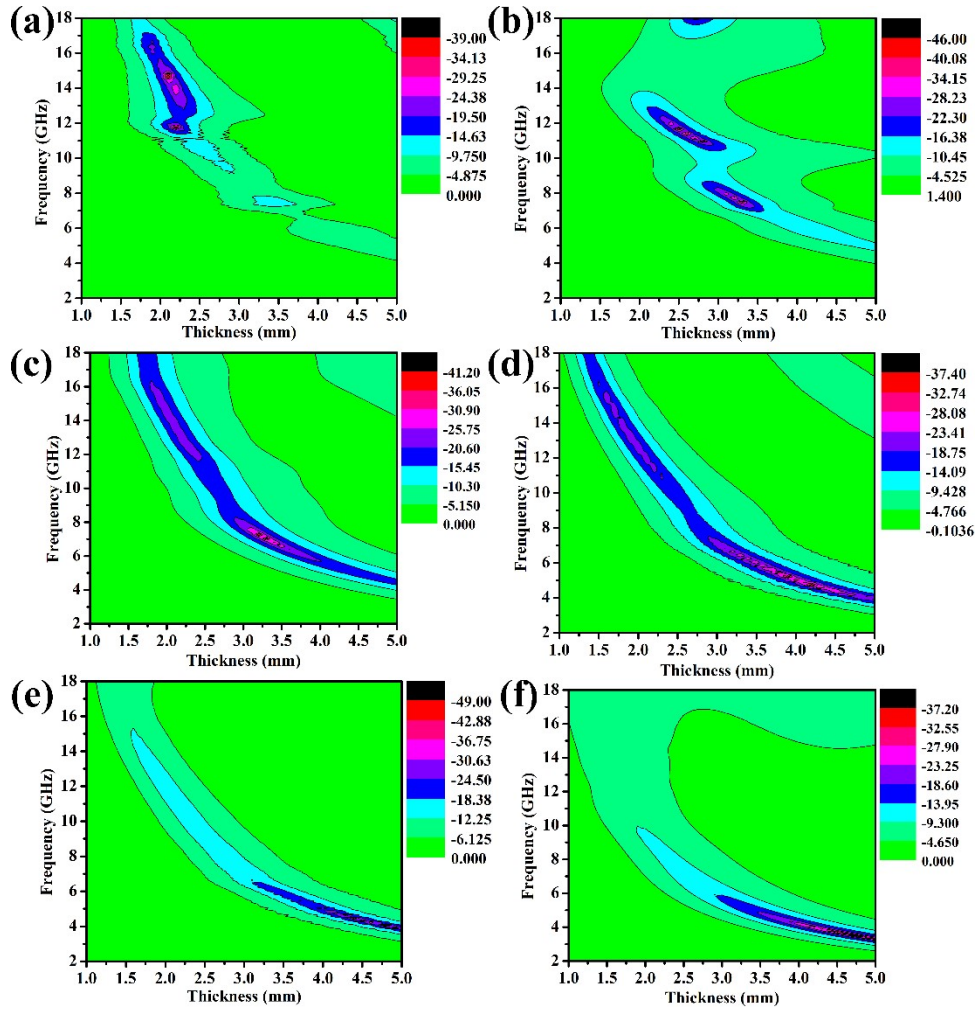

**Figure S8.** Contour maps depended on the frequency and the thickness of the absorbers for (a) FMC-1, (b) FMC-2, (c) FMC-3, (d) FMC-4, (e) FMC-5 and (f) FMC-6.



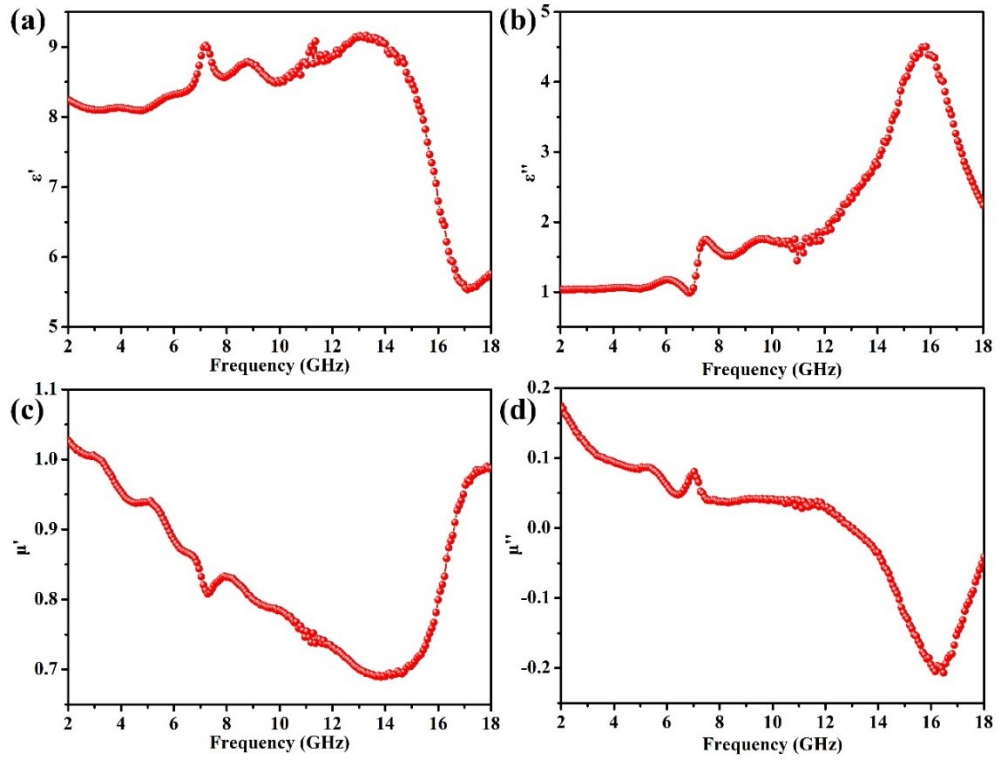

**Figure S9.** Electromagnetic parameters of MC (the real  $\epsilon'$  (a) and imaginary  $\epsilon''$  (b) parts of the complex permittivity; the real  $\mu'$  (c) and imaginary  $\mu''$  (d) parts of the complex permeability).

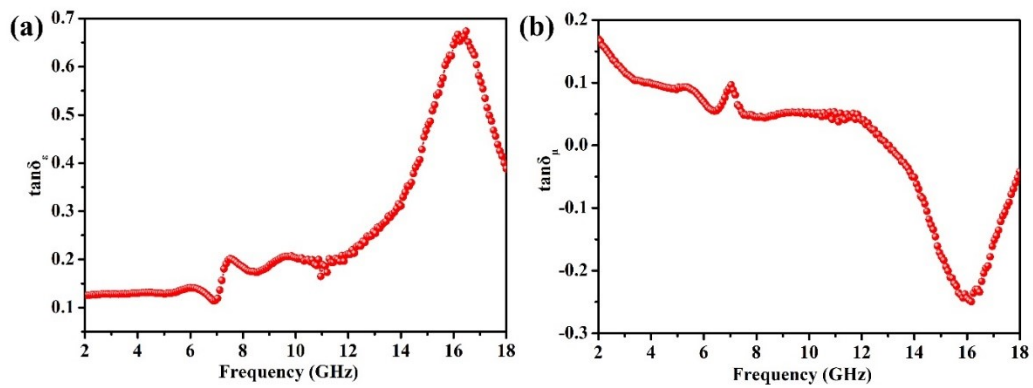

**Figure S10.** Electromagnetic parameters of MC (dielectric loss  $\tan\delta_\epsilon$  (a), and magnetic loss  $\tan\delta_\mu$  (b)).



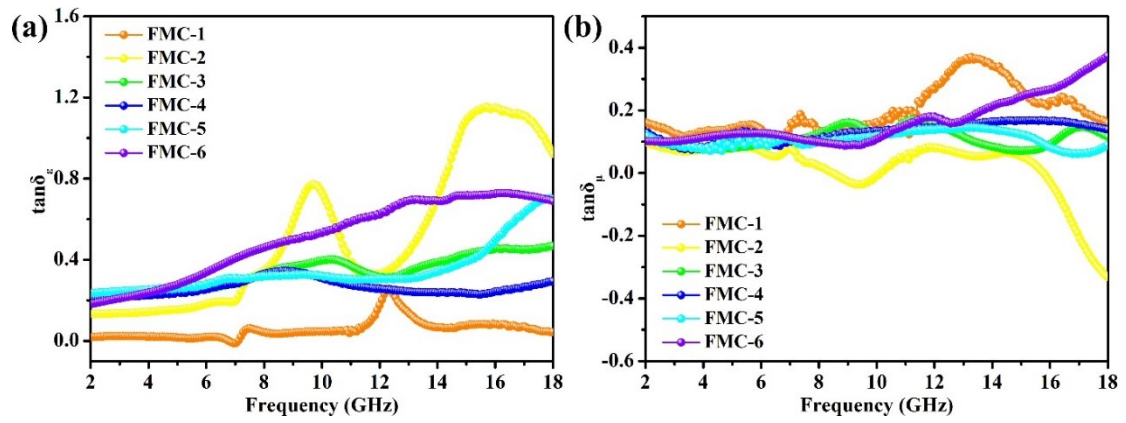

**Figure S11.** Electromagnetic parameters of FMC composites (dielectric loss  $\tan\delta_\epsilon$  (a), and magnetic loss  $\tan\delta_\mu$  (b)).

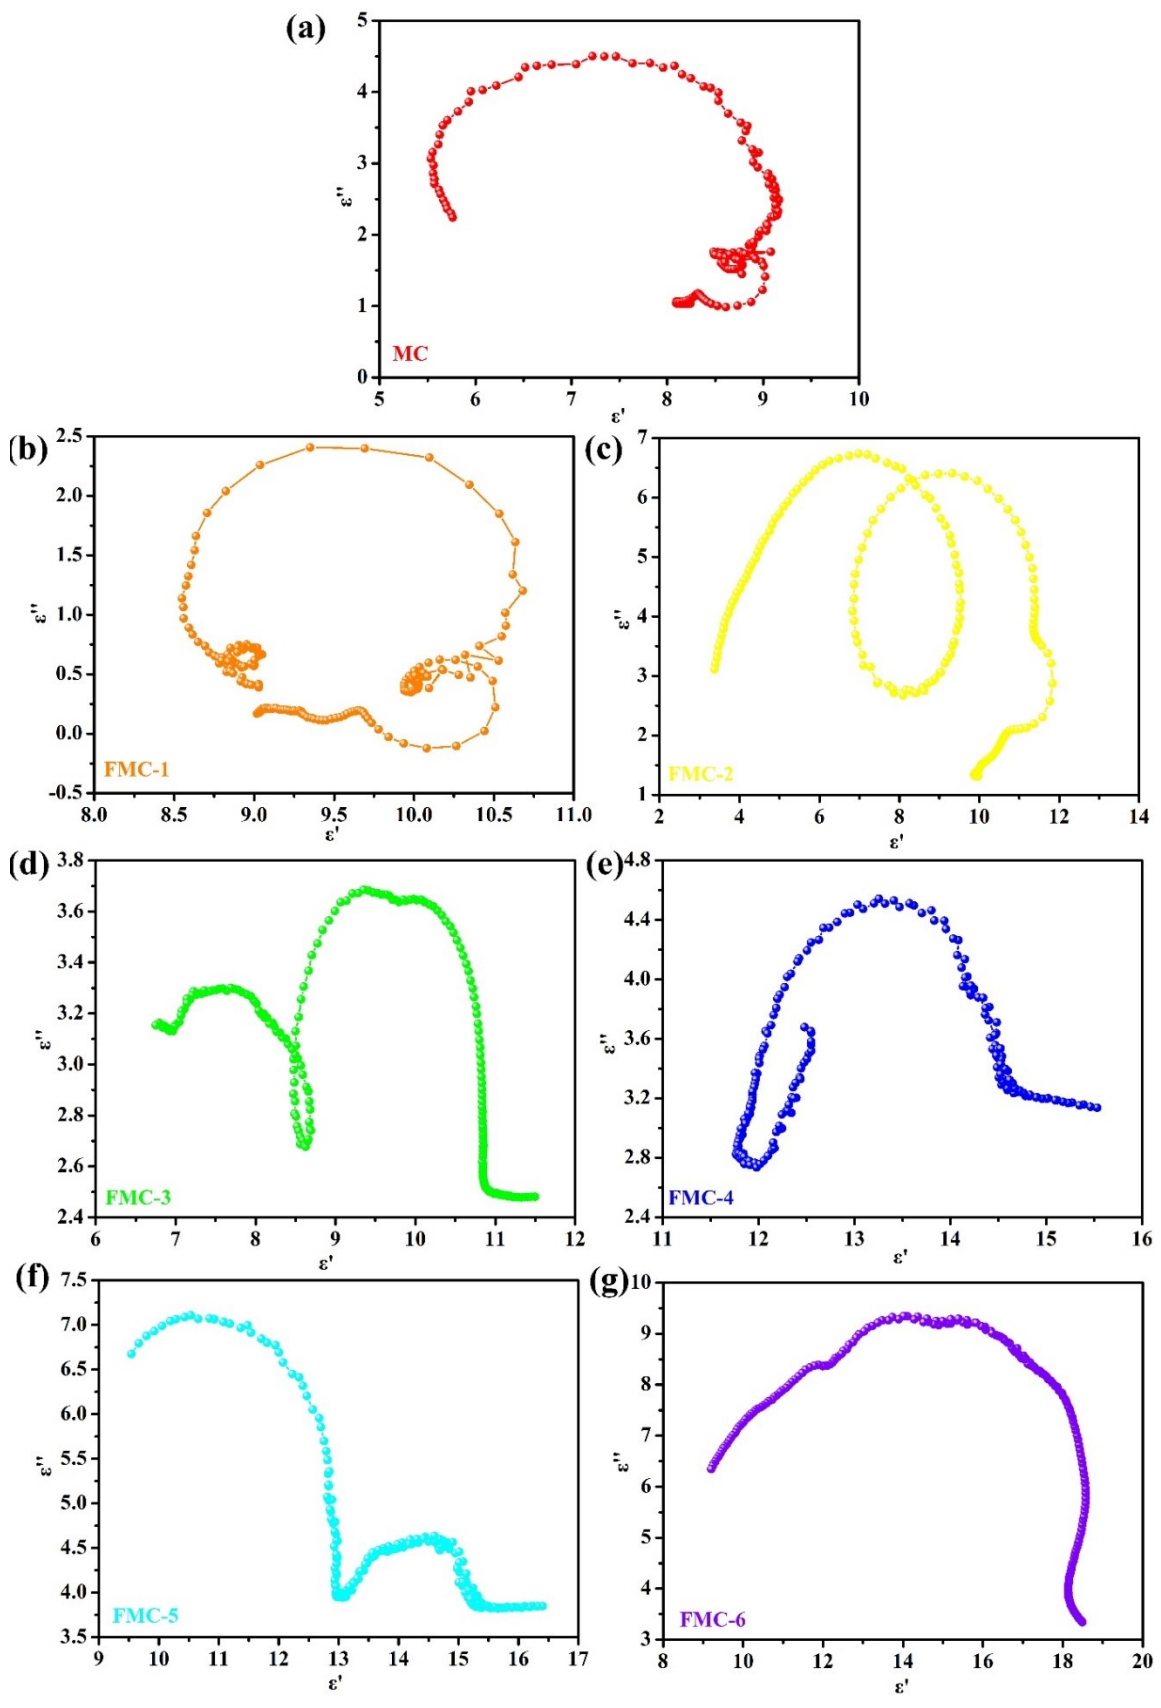

Figure S12. Cole-Cole plots of MC and FMCs.

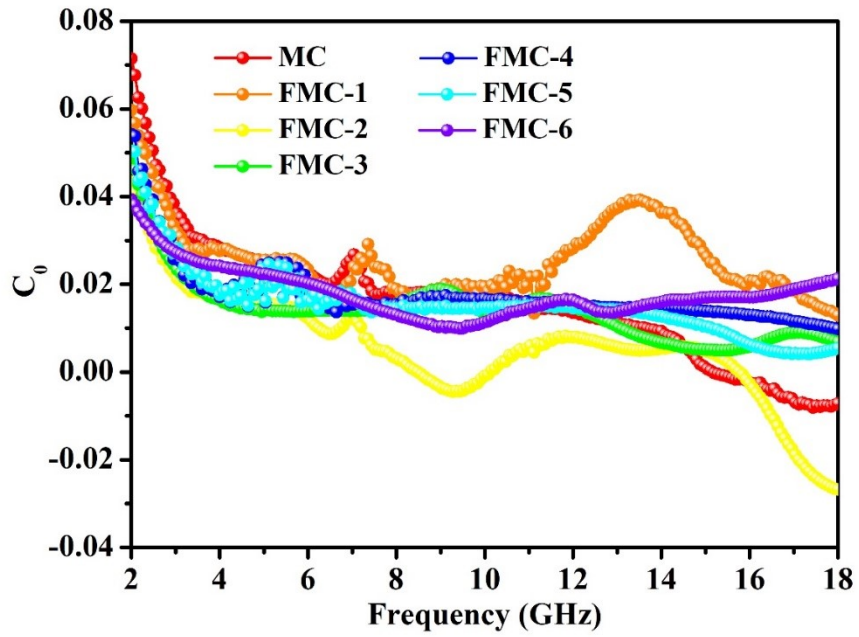

Figure S13.  $C_0$  values of MC and FMCs in the frequency range of 2-18 GHz

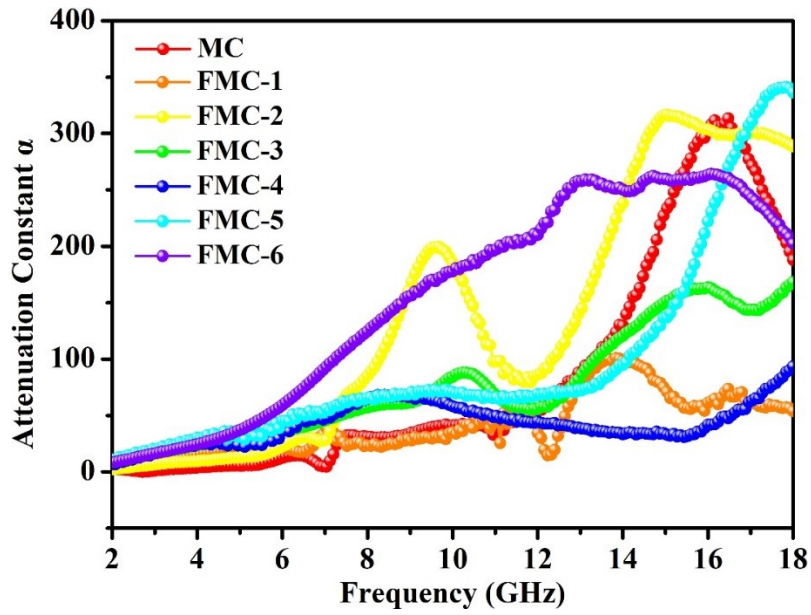

Figure S14. Attenuation constant  $\alpha$  of MC and FMCs in the frequency range of 2-18 GHz

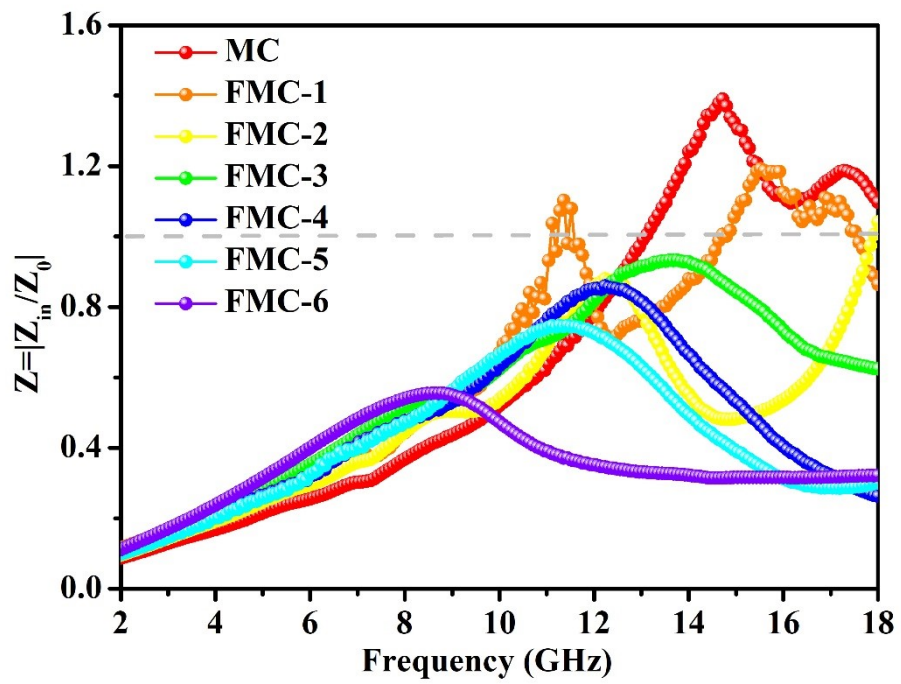

**Figure S15.** The impedance matching value  $Z$  of MC and FMCs in the frequency range of 2-18 GHz

**TableS1.** ICP–OES results of FMCs

| Sample | Fe(mg/L) | Mo(mg/L) | Molar ratio (Fe <sub>0.54</sub> Mo <sub>0.73</sub> /Mo <sub>2</sub> C) |
|--------|----------|----------|------------------------------------------------------------------------|
| FMC-1  | 1.935    | 9.285    | 2.56                                                                   |
| FMC-2  | 2.144    | 9.941    | 2.74                                                                   |
| FMC-3  | 2.413    | 11.141   | 2.85                                                                   |
| FMC-4  | 2.670    | 12.159   | 2.99                                                                   |
| FMC-5  | 1.893    | 8.092    | 3.25                                                                   |
| FMC-6  | 2.389    | 9.741    | 3.61                                                                   |

**TableS2.** Electromagnetic wave absorption of typical carbon-based materials reported in recent literatures.

| Band    | Materials                                                                       | Minimum RL<br>(dB) | Frequenc<br>y<br>(GHz) | Bandwidth<br>range<br>(GHz) | Ref.      |
|---------|---------------------------------------------------------------------------------|--------------------|------------------------|-----------------------------|-----------|
| Ku band | NiAl-LDH/Graphite                                                               | -41.50             | 17.80                  | 4.40                        | [1]       |
|         | Fe <sub>3</sub> N@C                                                             | -42.35             | 17.40                  | 6.00                        | [2]       |
|         | P-doped carbonized bacterial<br>cellulose/MoSe <sub>2</sub>                     | -66.84             | 16.96                  | 10.00                       | [5]       |
|         | Ni/C                                                                            | -57.25             | 16.10                  | 5.10                        | [3]       |
|         | C@MoO <sub>2</sub> /Graphite                                                    | -35.40             | 16.00                  | 4.50                        | [4]       |
|         | FMC-1                                                                           | -39.00             | 14.64                  | 5.04                        | This work |
| X band  | Carbonized bacterial<br>cellulose/MoSe <sub>2</sub>                             | -53.33             | 10.64                  | 4.04                        | [5]       |
|         | CoNSs@RGO                                                                       | -45.15             | 10.52                  | 7.14                        | [6]       |
|         | Graphene/ Si <sub>3</sub> N <sub>4</sub>                                        | -23.50             | 9.27                   | 4.20                        | [7]       |
|         | Mo <sub>2</sub> C/C                                                             | -49.19             | 9.04                   | 4.56                        | [8]       |
|         | Mo <sub>4.8</sub> Si <sub>3</sub> C <sub>0.6</sub> /SiC/C <sub>free</sub>       | -59.00             | 8.00                   | 12.55                       | [9]       |
|         | FMC-2                                                                           | -45.92             | 11.68                  | 3.28                        | This work |
| C band  | Co <sub>9</sub> S <sub>8</sub> /C/Ti <sub>3</sub> C <sub>2</sub> T <sub>x</sub> | -50.07             | 7.60                   | 4.24                        | [10]      |
|         | C@MoO <sub>2</sub> /Graphite                                                    | -33.50             | 6.90                   | 4.88                        | [4]       |
|         | Mo <sub>2</sub> C/Co/C                                                          | -48.00             | 6.60                   | 15.00                       | [11]      |
|         | CoNC/CNTs                                                                       | -44.60             | 5.20                   | 4.50                        | [12]      |
|         | FMC-5                                                                           | -48.91             | 4.08                   | 1.04                        | This work |
| S band  | Ni/MWCNT                                                                        | -24.90             | 2.80                   | —                           | [13]      |
|         | FMC-6                                                                           | -37.15             | 3.52                   | 0.8                         | This work |

## References

- 1 X. F. Xu, S. H. Shi, Y. L. Tang, G. Z. Wang, M. F. Zhou, G. Q. Zhao, X. C. Zhou, S. W. Lin, F. B. Meng, Growth of NiAl-Layered Double Hydroxide on Graphene toward Excellent Anticorrosive Microwave Absorption Application. *Adv. Sci.*, 2021, **8**, 2002658.
- 2 X. Q. Cui, X. H. Liang, W. Liu, W. H. Gu, G. B. Ji and Y. W. Du, Stable microwave absorber derived from 1D customized heterogeneous structures of Fe<sub>3</sub>N@C. *Chem. Eng. J.*, 2020, **381**, 122589.
- 3 Y. Qiu, Y. Lin, H. B. Yang, L. Wang, M. Q. Wang and B. Wen, Hollow Ni/C microspheres derived from Ni-metal organic framework for electromagnetic wave absorption. *Chem. Eng. J.*, 2020, **383**, 123207.
- 4 C. Wu, Z. F. Chen, M. L. Wang, X. Cao, Y. Zhang, P. Song, T. Y. Zhang, X. L. Ye, Y. Yang, W. H. Gu, J. D. Zhou, Y. Z. Huang, Confining Tiny MoO<sub>2</sub> Clusters into Reduced Graphene Oxide for Highly Efficient Low Frequency Microwave Absorption. *Small*, 2020, **16**, 2001686.
- 5 Z. J. Xu, M. He, Y. M. Zhou, S. X. Nie, Y. J. Wang, Y. Huo, Y. F. Kang, R. L. Wang, R. Xu, H. Peng, X. Chen, Spider web-like carbonized bacterial cellulose/MoSe<sub>2</sub> nanocomposite with enhanced microwave attenuation performance and tunable absorption bands. *Nano Res.*, 2021, **14**, 738-746.
- 6 Y. Ding, Z. Zhang, B. Luo, Q. Liao, S. Liu, Y. Liu, Y. Zhang, Investigation on the broadband electromagnetic wave absorption properties and mechanism of Co<sub>3</sub>O<sub>4</sub>-nanosheets/reduced-graphene-oxide composite. *Nano Res.*, 2017, **10**, 980-990.
- 7 F. Ye, Q. Song, Z. C. Zhang, W. Li, S. Y. Zhang, X. W. Yin, Y. Z. Zhou, H. W. Tao, Y. S. Liu, L. F. Cheng, L. T. Zhang, H. J. Li, Direct Growth of Edge-Rich Graphene with Tunable Dielectric Properties in Porous Si<sub>3</sub>N<sub>4</sub> Ceramic for Broadband High-Performance Microwave Absorption. *Adv. Funct. Mater.*, 2018, **28**, 1707205.
- 8 S. S. Dai, Y. Cheng, B. Quan, X. H. Liang, W. Liu, Z. H. Yang, G. B. Ji and Y. W. Du, Porous-carbon-based Mo<sub>2</sub>C nanocomposites as excellent microwave absorber: a new exploration. *Nanoscale*, 2018, **10**, 6945-6953.
- 9 Y. Feng, Y. j. Yang, Q. B. Wen, R. Riedel, Z. J. Yu, Dielectric Properties and Electromagnetic Wave Absorbing Performance of Single-Source-Precursor Synthesized Mo<sub>4.8</sub>Si<sub>3</sub>C<sub>0.6</sub>/SiC/C<sub>free</sub> Nanocomposites with an In Situ Formed Nowotny Phase. *ACS Appl. Mater. Interfaces*, 2020, **12**, 16912-16921.
- 10 T. Q. Hou, Z. R. Jia, B. B. Wang, H. B. Li, X. H. Liu, L. Bi, G. L. Wu, MXene-based accordion 2D hybrid structure with Co<sub>9</sub>S<sub>8</sub>/C/Ti<sub>3</sub>C<sub>2</sub>T<sub>x</sub> as efficient electromagnetic wave absorber. *Chem. Eng. J.*, 2021, **414**, 128875.
- 11 Y. H. Wang, X. D. Li, X. J. Han, P. Xu, L. R. Cui, H. H. Zhao, D. W. Liu, F. Y. Wang and Y. C. Du, Ternary Mo<sub>2</sub>C/Co/C composites with enhanced electromagnetic waves absorption. *Chem. Eng. J.*, **2020**, **387**, 124159.
- 12 X. Q. Xu, F. T. Ran, Z. M. Fan, H. Lai, Z. J. Cheng, T. Lv, L. Shao, Y. Y. Liu, Cactus-Inspired Bimetallic Metal–Organic Framework-Derived 1D–2D Hierarchical Co/N-Decorated Carbon Architecture toward Enhanced Electromagnetic Wave Absorbing Performance. *ACS Appl. Mater. Interfaces*, 2019, **11**, 13564-13573.

- 13 G. Tong, F. Liu, W. Wu, F. Du and J. G. Guan, Rambutan-like Ni/MWCNT heterostructures: Easy synthesis, formation mechanism, and controlled static magnetic and microwave electromagnetic characteristics. *J. Mater. Chem. A*, 2014, **2**, 7373-7382.
